# Supplementary material
Source: publisher figshare collection journal article supplement (https://acs.figshare.com/ndownloader/files/22435244)
Supplement: Supplementary file 1 [file 22435244]

## Supporting Information

### Naturally Occurring and Biomimetic Synthesized Calcite Spherulites

Shitao Wu, Justine I. Blake, Li Guo and Wuzong Zhou

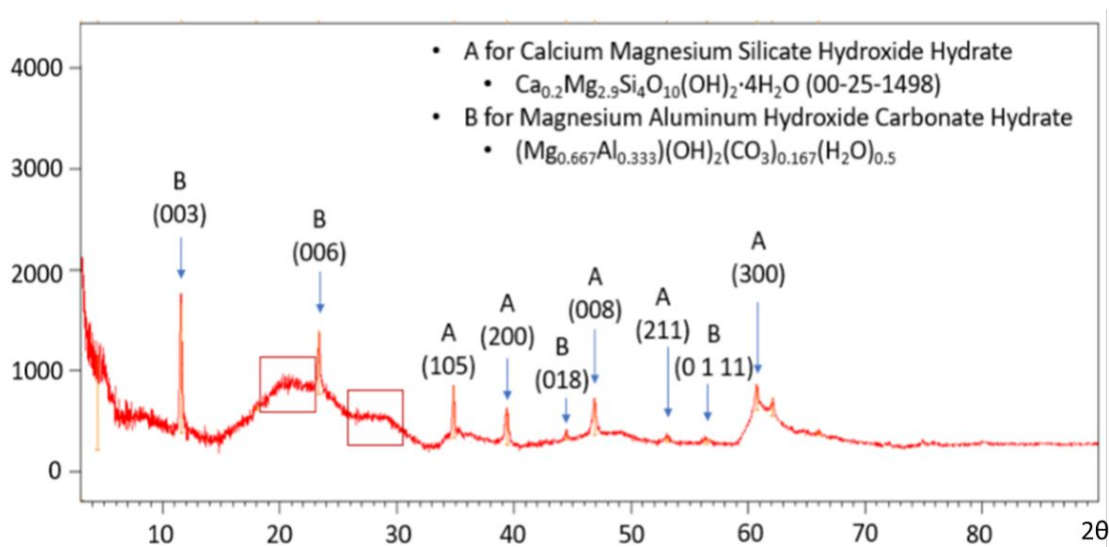

**Figure S1.** XRD pattern from a dried stevensite specimen.

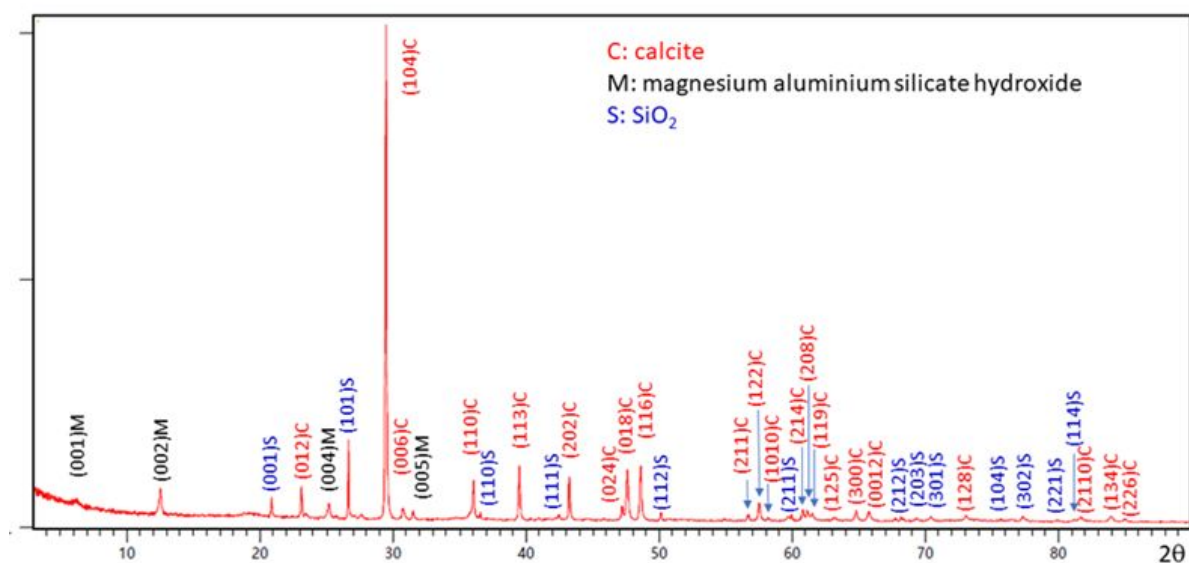

**Figure S2.** A typical XRD pattern from natural rock sample containing many calcite spherulites.

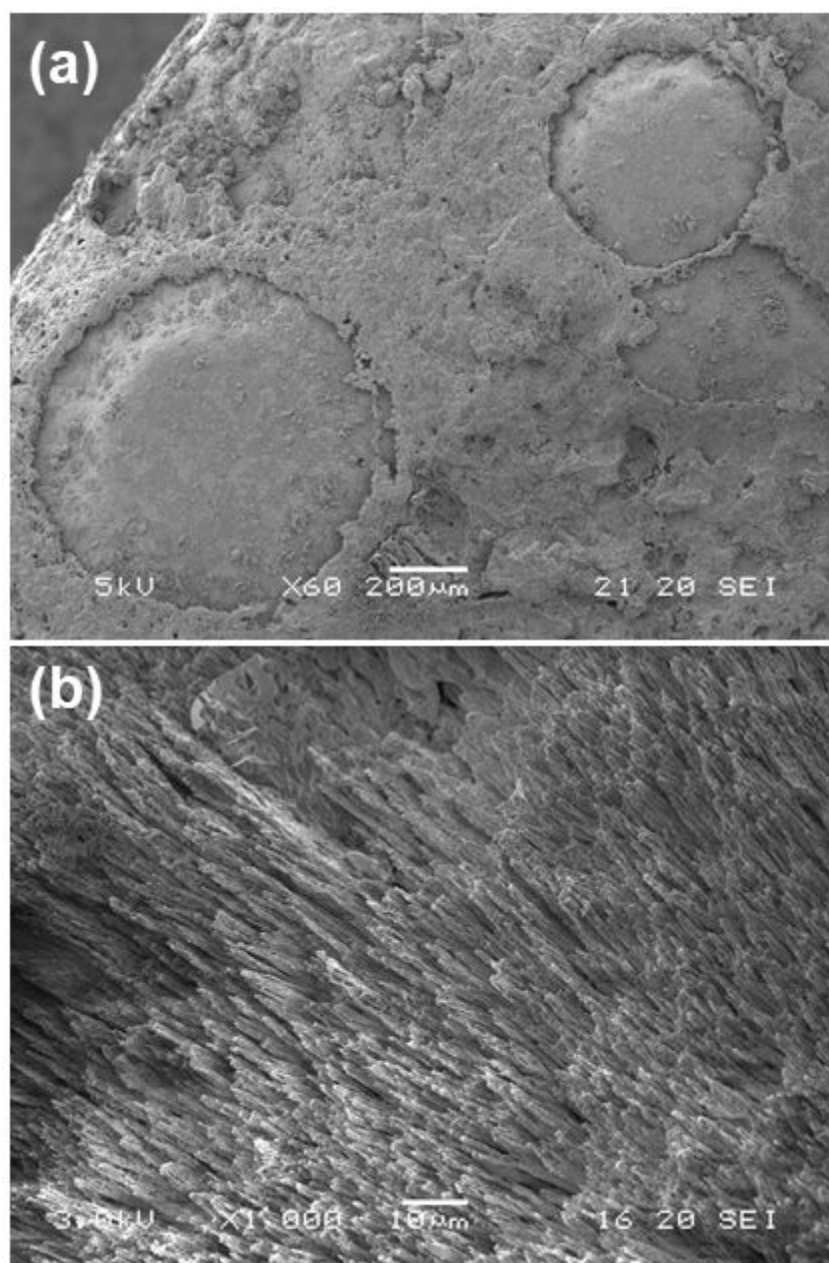

**Figure S3.** (a) SEM image of a rock sample with two spherulite exposing to the surface. (b) SEM image of a spherulite surface after acid treatment, revealing the microrods.

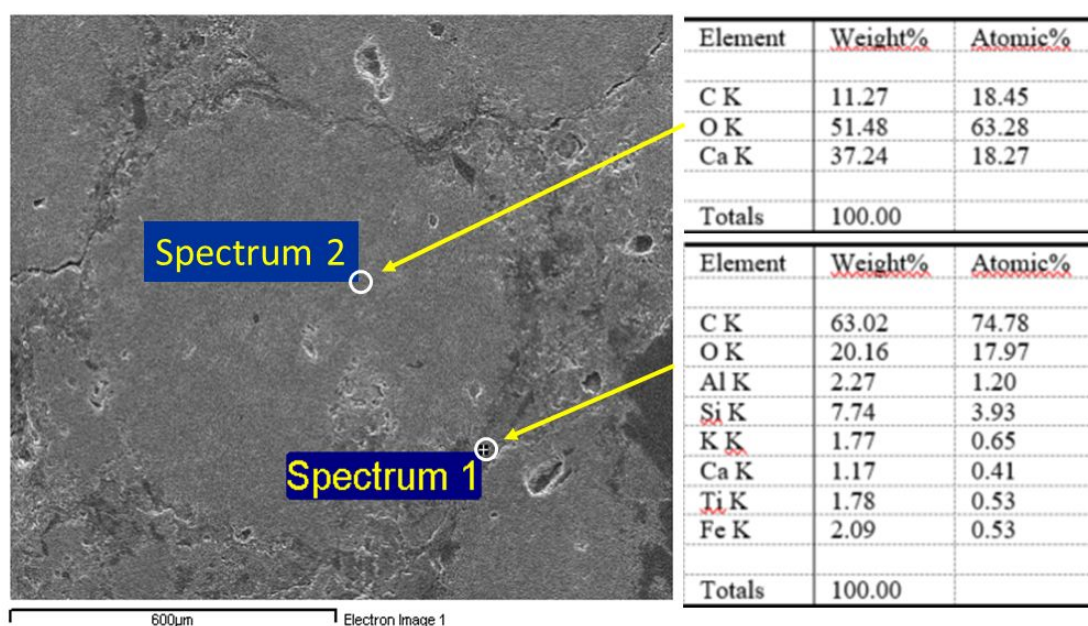

**Figure S4.** EDX point analysis of a spherulite with a thin C-rich surface layer.

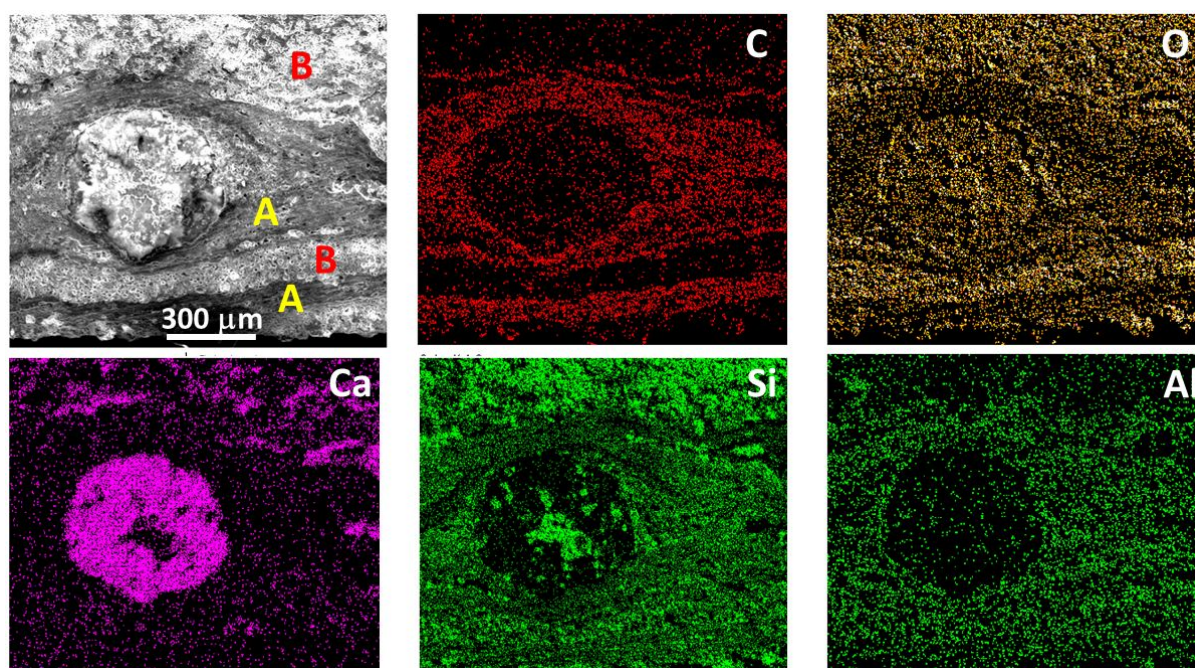

**Figure S5.** EDX elemental mapping of a spherulite with its surroundings. Top-left picture is a SEM image of the area. The spherulite is covered by two layers, A is C-rich and O-poor. B is mainly silicate.



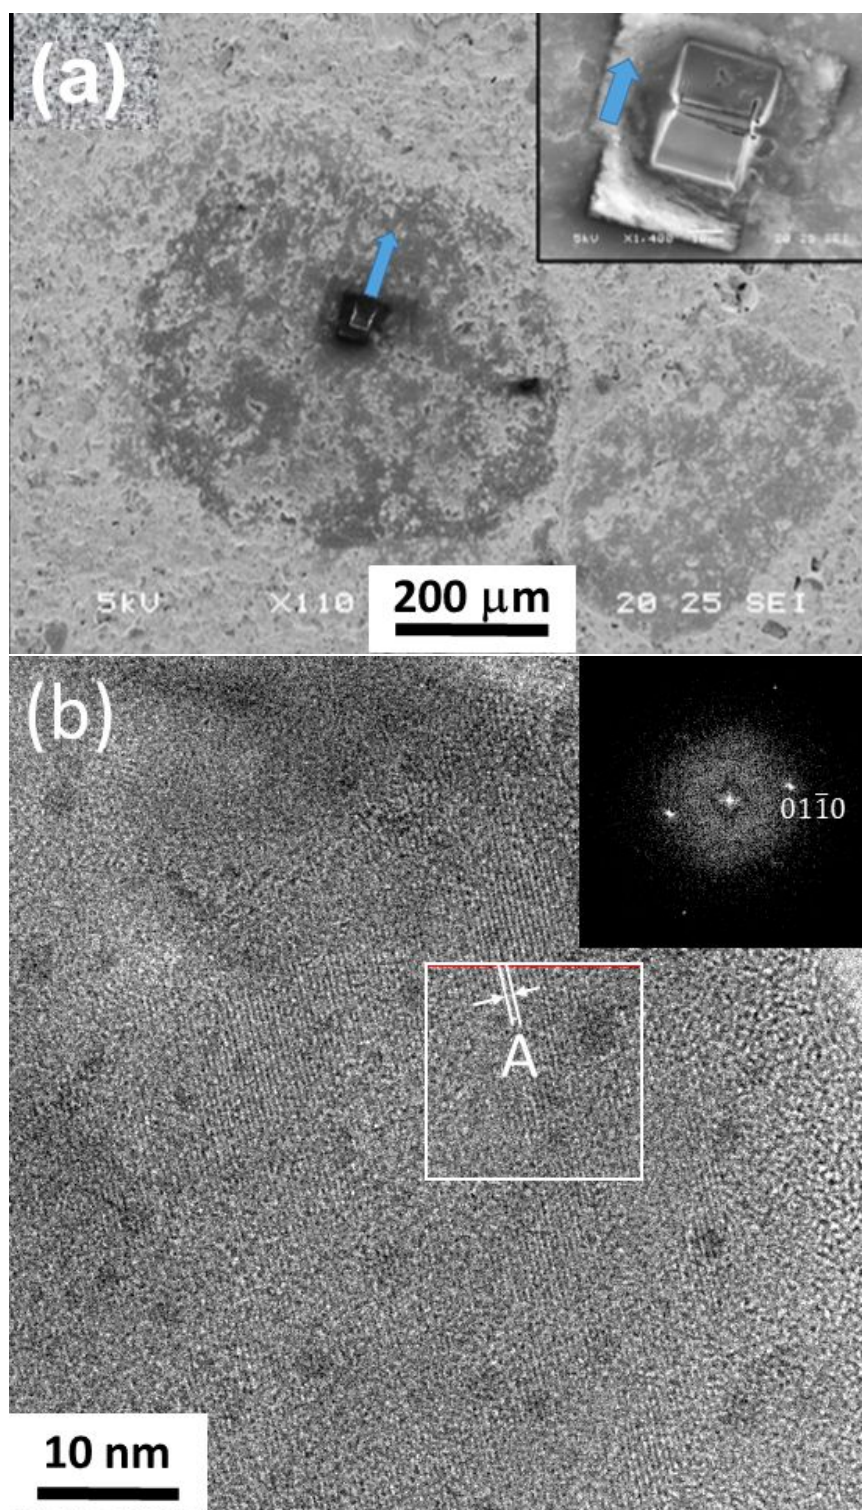

**Figure S6.** (a) SEM image of a naturally occurring spherulite showing the location of FIB cutting. The resulted specimen plate is normal to the radial direction. (b) The corresponding HRTEM image of an edge of a microrod, showing many separated nanocrystallites. The fringes “A” are indexed to (01-10) of the calcite structure.

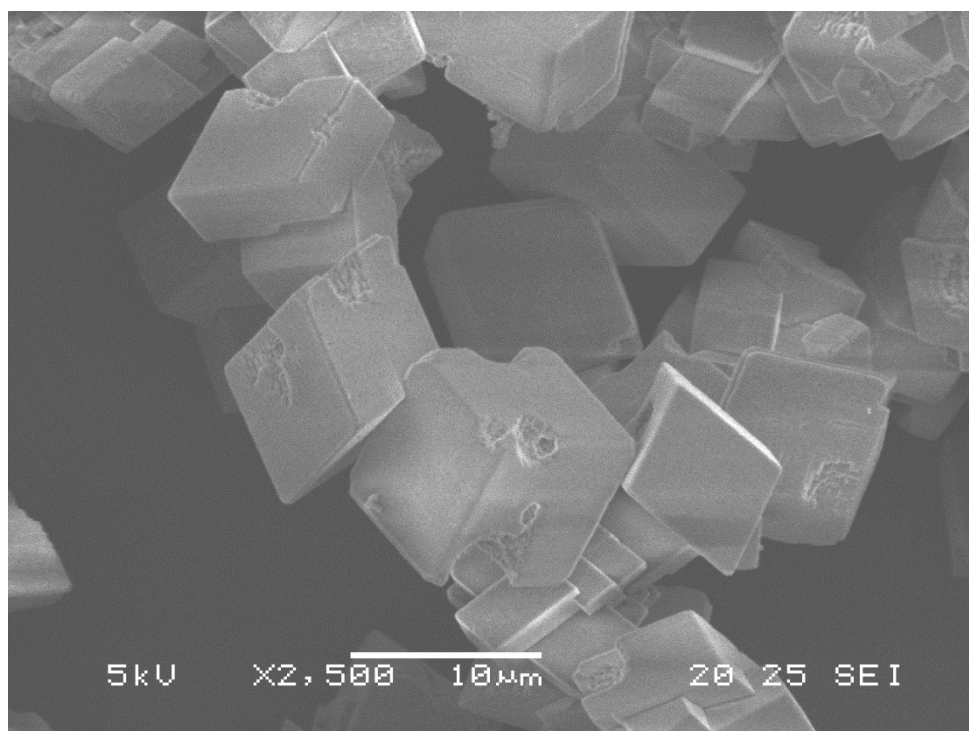

**Figure S7.** SEM image of rhombohedral crystals in group 1 via a simple mixture of 5.0 mmol  $\text{CaCl}_2$  and  $\text{Na}_2\text{CO}_3$  solutions. The reaction time is 7 days.

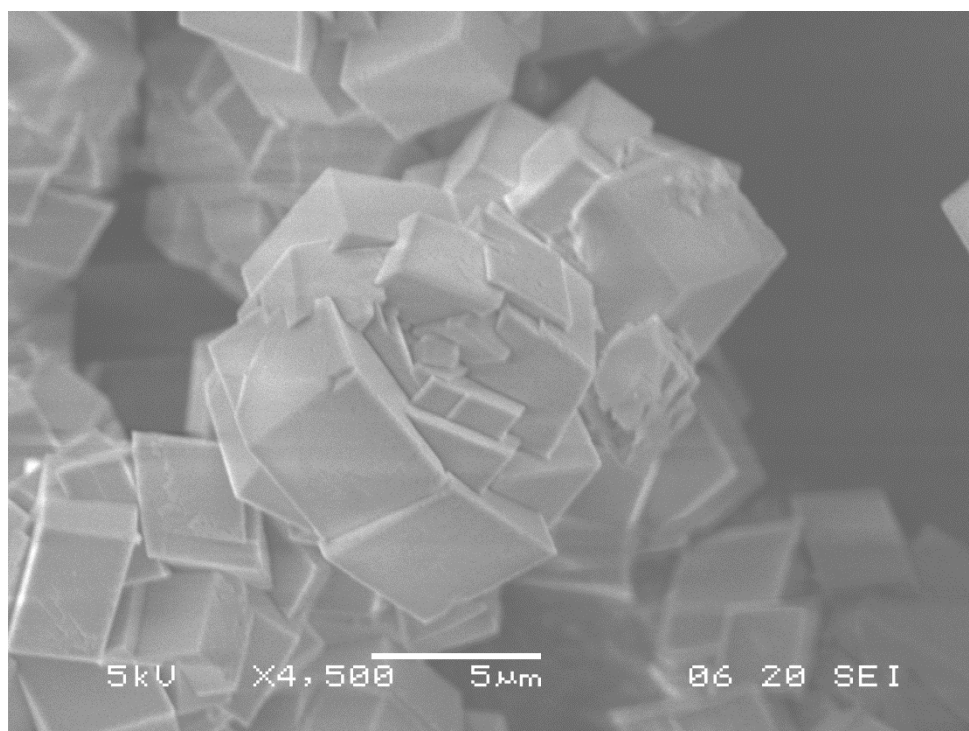

**Figure S8.** SEM image of rhombohedral crystals in group 2 via a mixture of 5.0 mmol  $\text{CaCl}_2$  and a stevensite suspension, followed by addition of 5.0 mmol  $\text{Na}_2\text{CO}_3$  solution. The reaction time is 72 h.

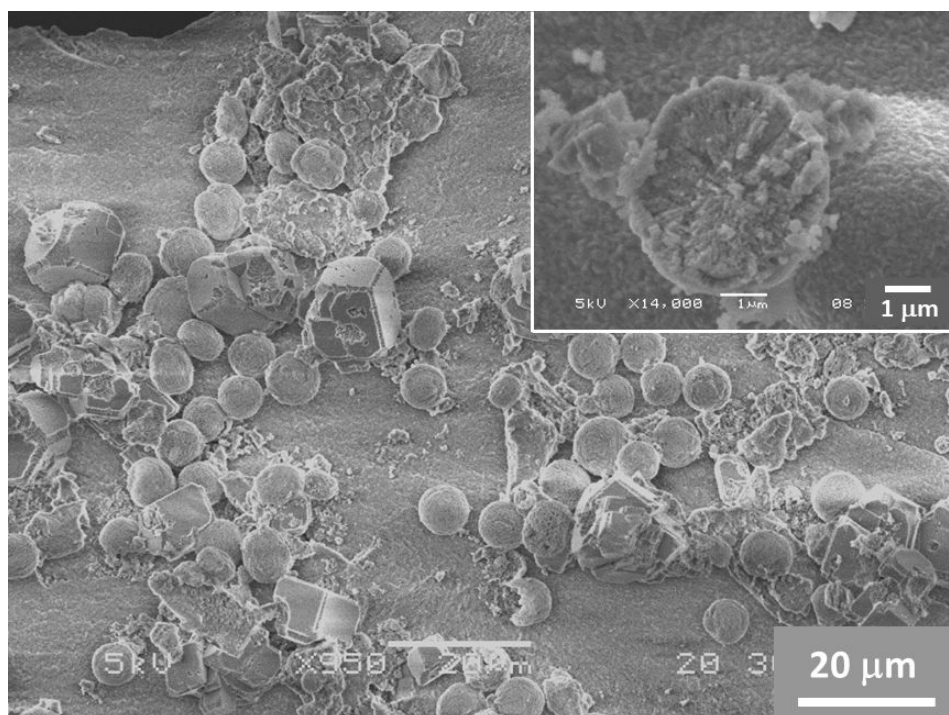

**Figure S9.** SEM image of a specimen in Group 4 with reaction time of 3 h, showing a mixture of bulk crystals and spherulites. The inset is a SEM image of cross section of a spherulite with the reaction time of 30 min.

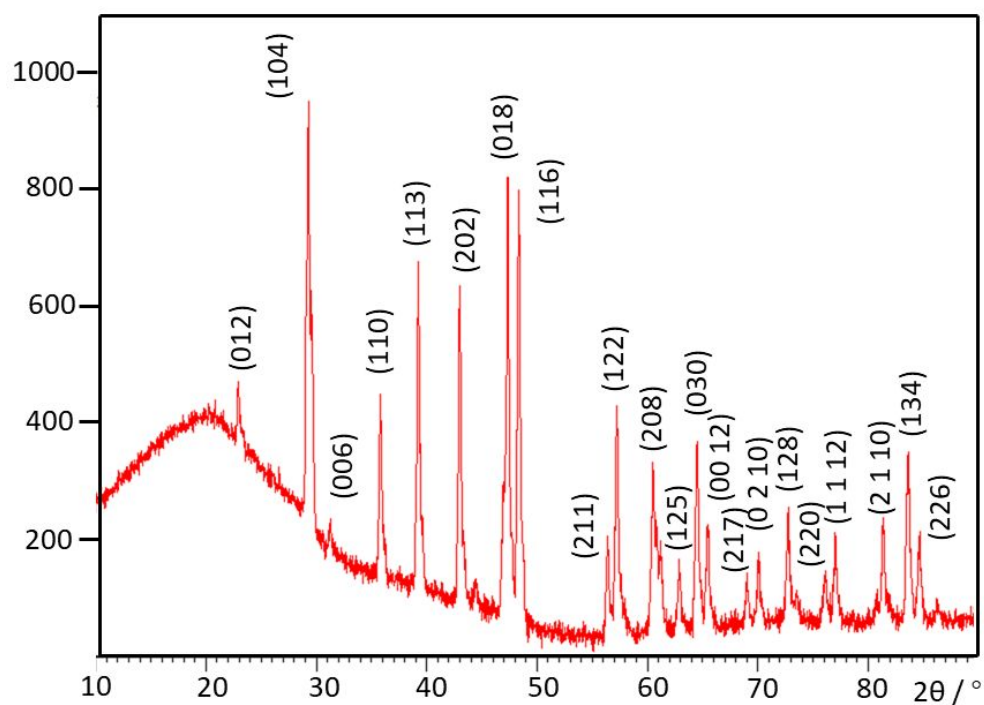

**Figure S10.** PXRD pattern of Group 6 sample with reaction time of 30 min. The diffraction peaks are indexed to the rhombohedral structure of calcite. The sample also contains a large amount of alginate.



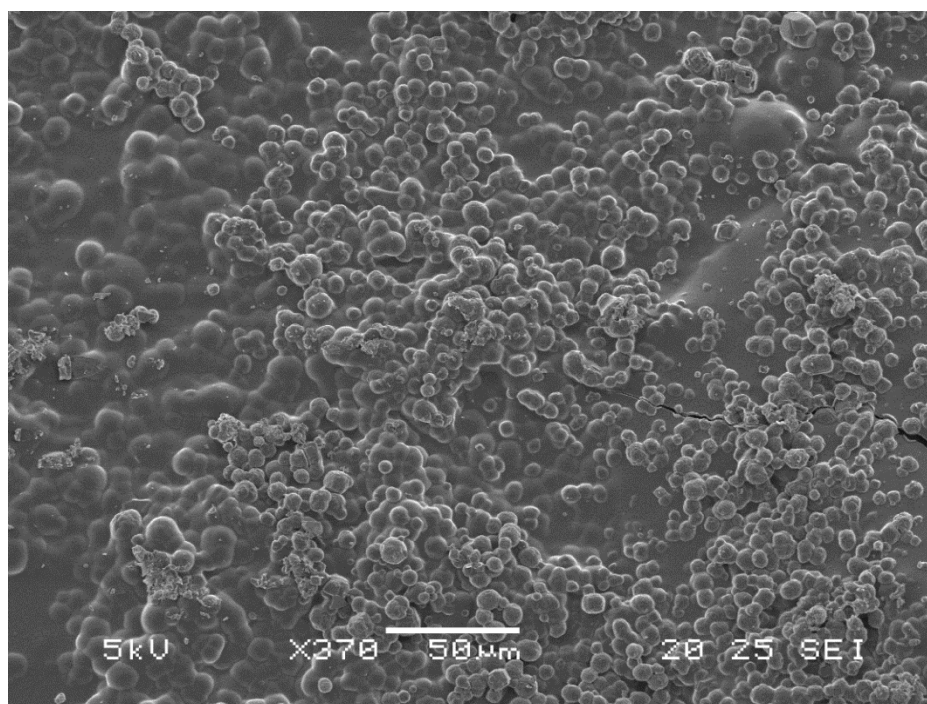

**Figure S11.** SEM image of a specimen in Group 7 with reaction time of 6 days, showing a high stability of the spherulites.

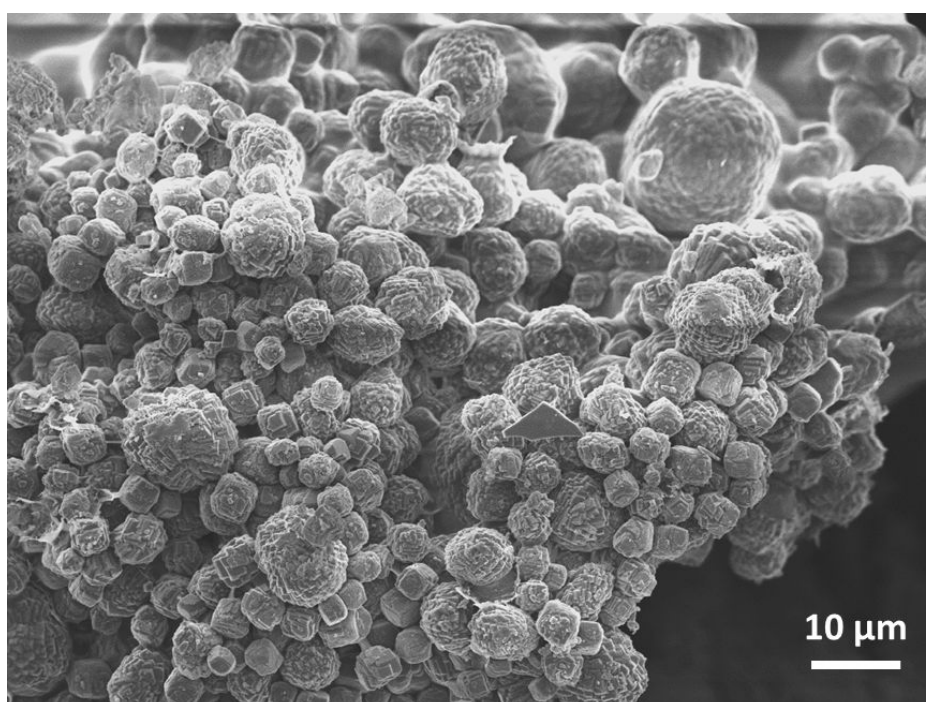

**Figure S12.** SEM image of a specimen in Group 8 with a reaction time of 1 h.

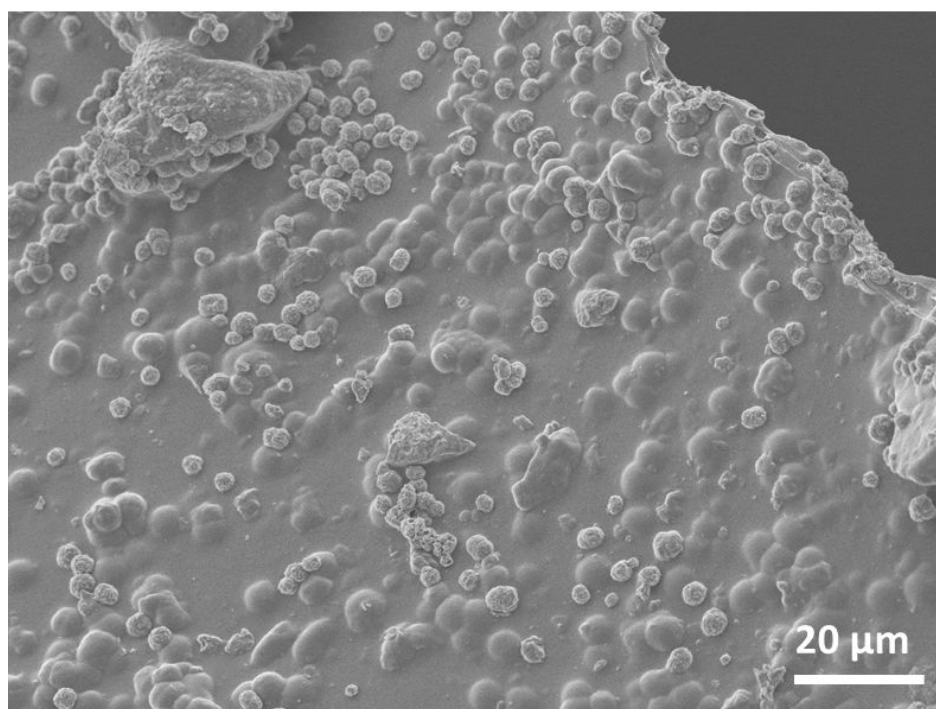

**Figure S13.** SEM image of a specimen in Group 9 with a reaction time of 1 h.

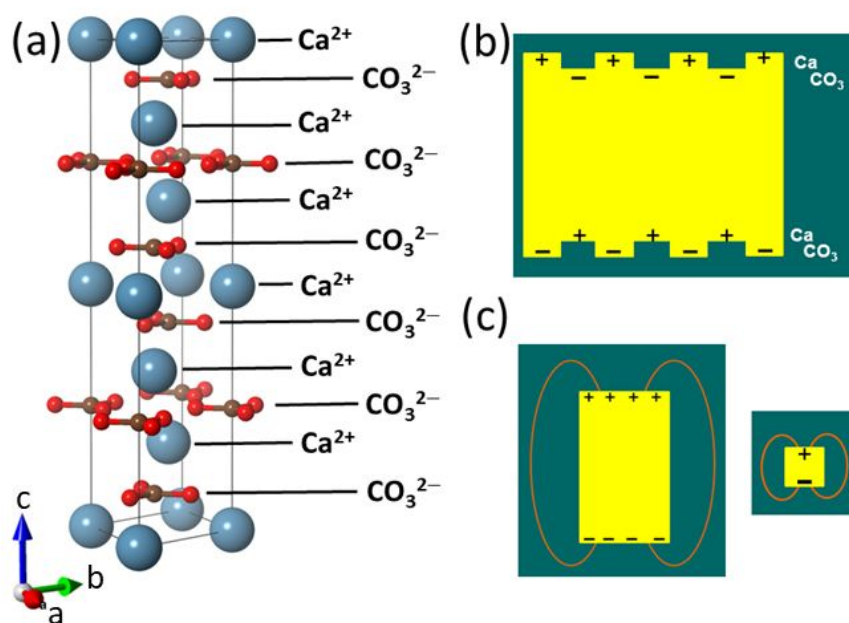

**Figure S14.** Schematic drawing of (a) the structure of calcite, showing alternative layers of  $\text{Ca}^{2+}$  and  $\text{CO}_3^{2-}$  along the c axis, (b) a large crystal with uneven {0001} surfaces, (c) large and small crystals with charge separation to form a dipolar field.
